# Supplementary material
Source: Preprints.org preprint supplement (doi:10.20944/preprints202003.0114.v1)
Supplement: Supplementary file 2 [file Supplementary tables.xls]

## Sheet: Table S1
Table S1 Differentially expressed genes between big and medium sized F1 plants
	Fold change (B1&B2/M1&M2)	Description of genes
B1&B2 > M1&M2 expression
At4g15210	7.34475	beta-amylase
At3g49620	6.26925	putative protein SRG1 protein - Arabidopsis thaliana, PIR:S44261
At3g23250	5.94364	myb-related transcription factor
At5g24110	5.50784	unknown protein
At1g30135	5.30079	Expressed protein
At2g37430	5.06953	putative C2H2-type zinc finger protein likely a nucleic acid binding protein
At2g26020	4.8805	putative antifungal protein
At1g73010	4.75666	hypothetical protein
At5g20790	4.55644	putative protein predicted protein
At4g30290	4.35121	xyloglucan endo-1,4-beta-D-glucanase-like protein
At3g23230	4.05249	ethylene responsive element binding protein
At5g64120	4.00551	peroxidase
At5g39580	3.90972	peroxidase ATP24a
At1g12610	3.892	transcriptional activator CBF1
At3g01830	3.83412	hypothetical protein similar to calmodulin-like protein
At4g34410	3.78742	putative protein ethylene-responsive element binding protein homolog
At5g44420	3.48287	antifungal protein-like (PDF1.2)
At1g16370	3.44708	putative transport protein
At5g42380	3.21591	putative protein contains similarity to calmodulin
At3g49580	3.18933	putative protein
At2g22880	3.14391	hypothetical protein
At1g65400	3.13237	hypothetical protein contains similarity to lectin polypeptide
At1g65390	3.08148	disease resistance protein RPS4
At5g62520	3.06	putative protein
At1g05575	3.01438	Expressed protein
At4g23810	2.99355	putative protein AR411
At4g37290	2.99176	hypothetical protein
At2g44840	2.93541	putative ethylene response element binding protein (EREBP)
At2g34600	2.91099	hypothetical protein
At2g43620	2.87125	putative endochitinase
At3g25250	2.87012	protein kinase
At3g02840	2.8596	unknown protein
At5g52050	2.81537	integral membrane protein-like
At2g17660	2.81485	unknown protein
At2g32140	2.79272	putative disease resistance protein
At4g30280	2.78228	xyloglucan endo-1,4-beta-D-glucanase-like protein
At2g11810	2.73553	putative monogalactosyldiacylglycerol synthase
At3g26200	2.71667	cytochrome P450
At1g21100	2.7132	O-methyltransferase
At1g21110	2.68821	O-methyltransferase
At1g17380	2.6832	unknown protein
At1g17710	2.67814	hypothetical protein
At2g22760	2.60985	putative bHLH transcription factor
At5g59515	2.60859	Expressed protein
At4g24380	2.60806	putative protein dihydrofolate reductase
At1g66160	2.59515	unknown protein
At1g19210	2.58717	AP2 domain transcription factor
At2g35930	2.58662	unknown protein
At5g09800	2.57281	putative protein
At5g14700	2.57268	cinnamoyl CoA reductase
At2g25735	2.56402	Expressed protein
At5g04340	2.56363	putative c2h2 zinc finger transcription factor
At1g13300	2.5473	unknown protein ; supported by cDNA: gi_13605874_gb_AF367336.1_AF367336
At1g09950	2.54717	hypothetical protein Similar to Nicotiana tumor-related protein (gb|26453)
At3g50930	2.54117	BCS1 protein-like protein
At3g47420	2.52561	putative protein sn-glycerol-3-phosphate permease
At1g66090	2.51261	disease resistance protein
At3g16530	2.49271	putative lectin similar to lectin
At1g74430	2.4849	putative MYB family transcription factor
At3g18710	2.48341	hypothetical protein
At5g48850	2.47224	putative protein
At1g14540	2.46817	anionic peroxidase
At5g47230	2.45774	ethylene responsive element binding factor 5 (ATERF5)
At1g22810	2.42703	TINY-like transcription factor
At5g20150	2.41022	ids4-like protein ids-4 protein
At3g52450	2.40766	putative protein arm repeat containing protein ARC1 -Brassica napus
At1g72520	2.4047	putative lipoxygenase similar to lipoxygenase
At5g61160	2.40185	anthocyanin 5-aromatic acyltransferase
At5g13220	2.39699	putative protein predicted proteins
At1g58420	2.38634	hypothetical protein
At5g48540	2.38322	33 kDa secretory protein-like
At1g03020	2.36676	putative glutaredoxin
At5g12340	2.35435	putative protein
At4g17490	2.35072	ethylene responsive element binding factor-like protein (AtERF6)
At2g46400	2.3448	putative WRKY-type DNA binding protein
At5g64870	2.32167	nodulin-like
At5g56980	2.31511	putative protein
At4g14450	2.30828	hypothetical protein
At2g26530	2.30457	AR781, similar to yeast pheromone receptor
At4g08300	2.29292	nodulin-like protein nodulin gene MtN21 - Medicago truncatula
At3g02040	2.29114	hypothetical protein
At3g25790	2.26916	unknown protein
At3g22160	2.26323	unknown protein
At5g63450	2.26149	cytochrome P450-like protein
At1g61800	2.26107	glucose-6-phosphate/phosphate-translocator precursor
At3g17790	2.25549	acid phosphatase type 5 identical to GB:CAB63938 from [Arabidopsis thaliana]
At2g32210	2.25293	unknown protein
At5g45340	2.24932	cytochrome P450
At5g57220	2.24166	cytochrome P450
At5g64660	2.24101	putative protein
At4g21390	2.23023	serine/threonine kinase - like protein serine/threonine kinase BRLK, Brassica oleracea
At5g66650	2.22508	putative protein
At5g27420	2.20815	RING-H2 zinc finger protein-like RING-H2 zinc finger protein ATL6 - Arabidopsis thaliana
At1g02400	2.20778	dioxygenase
At1g56060	2.20682	hypothetical protein
At3g08860	2.20329	putative aminotransferase similar to beta-alanine-pyruvate aminotransferase
At2g35710	2.20292	putative glycogenin
At5g09980	2.20093	unknown protein
At2g39330	2.19873	putative myrosinase-binding protein
At1g06830	2.19537	glutaredoxin
At1g35210	2.19233	hypothetical protein
At2g14290	2.19118	hypothetical protein
At1g24260	2.17761	putative floral homeotic protein, AGL9
At2g24600	2.17642	hypothetical protein
At1g56660	2.16778	hypothetical protein
At3g48520	2.16641	cytochrome P450-like protein
At2g34930	2.16313	putative disease resistance protein
At1g24575	2.16259	Expressed protein
At1g23140	2.15924	unknown protein
At5g07100	2.15782	SPF1-like protein
At1g26380	2.1536	hypothetical protein similar to reticuline oxidase-like protein
At2g32150	2.14894	putative hydrolase
At1g33760	2.14445	TINY-like protein
At5g18470	2.14394	putative protein S-receptor kinase PK3 precursor
At5g59730	2.14114	putative protein leucine zipper-containing protein
At1g78410	2.141	hypothetical protein
At1g27820	2.1369	hypothetical protein contains similarity to CCR4-associated factor 1
At5g05300	2.13272	putative protein
At4g29780	2.12458	hypothetical protein
At5g26920	2.12012	calmodulin-binding
At5g47960	2.1103	RAS superfamily GTP-binding protein-like
At5g41740	2.10843	disease resistance protein-like
At3g19970	2.10802	unknown protein
At5g01540	2.10717	receptor like protein kinase
At5g67080	2.09887	protein kinase-like protein
At3g04720	2.09414	hevein-like protein precursor (PR-4) identical to hevein-like protein precursor
At5g64905	2.09198	Expressed protein
At1g24140	2.07895	putative metalloproteinase
At1g06620	2.05715	oxidoreductase
At1g75280	2.04657	NADPH oxidoreductase
At3g08720	2.03953	putative ribosomal-protein S6 kinase (ATPK19)
At2g35290	2.03833	hypothetical protein
At5g66640	2.03807	putative protein
At1g22500	2.02898	RING-H2 zinc finger protein ATL5
At3g26970	2.02745	geranylgeranylated protein
At2g02010	2.02618	putative glutamate decarboxylase
At1g66860	2.02342	unknown protein
At1g76650	2.02059	putative calmodulin
At5g47910	2.02049	respiratory burst oxidase protein
At2g44500	2.02012	similar to axi 1 protein from Nicotiana tabacum
At3g46660	2.01902	glucosyltransferase-like protein UDP-glucose glucosyltransferase
At4g31800	2.01726	Expressed protein
At5g51190	2.00956	putative protein contains similarity to ethylene responsive element binding factor
At5g39670	2.00727	calcium-binding protein - like cbp1 calcium-binding protein, Lotus japonicus
At5g22250	2.00559	CCR4-associated factor-like protein
At1g63090	2.00336	unknown protein
At5g24420	2.00164	6-phosphogluconolactonase-like protein
At5g09570	1.99848	putative protein
At1g76600	1.99393	unknown protein
At1g30720	1.99364	putative reticuline oxidase-like protein
At1g74450	1.99088	unknown protein
At1g69890	1.9845	hypothetical protein
At5g17350	1.984	putative protein
At3g16860	1.98379	unknown protein
At5g50570	1.97533	putative protein contains similarity to squamosa promoter binding protein
At5g54490	1.97371	putative protein
At2g21650	1.97274	unknown protein
At2g27310	1.97101	unknown protein
At5g22630	1.95579	chorismate mutase/prephenate dehydratase-like protein
At3g25780	1.95079	unknown protein
At4g17500	1.94952	ethylene responsive element binding factor 1
At3g59080	1.94596	putative protein CND41, chloroplast nucleoid DNA binding protein - Nicotiana tabacum
At4g02410	1.9455	contains similarity to a protein kinase domain
At4g33920	1.93997	putative protein protein phosphatase Wip1, Homo sapiens
At4g17615	1.92679	calcineurin B-like protein 1
At3g23240	1.92114	ethylene response factor 1 (ERF1) identical to ethylene response factor 1
At3g28340	1.91304	unknown protein
At4g30430	1.91116	senescence-associated protein homolog senescence-associated protein 5
At2g38940	1.91104	phosphate transporter (AtPT2)
At2g41640	1.897	unknown protein
At2g22860	1.89521	unknown protein
At2g39650	1.88992	unknown protein
At2g32030	1.88403	putative alanine acetyl transferase
At1g11050	1.87934	Ser/Thr protein kinase isolog
At4g23190	1.87574	serine/threonine kinase
At4g01080	1.87027	hypothetical protein
At3g23170	1.86851	unknown protein
At1g14480	1.86515	hypothetical protein contains similarity to alpha-latroinsectotoxin precursor
At1g74930	1.85447	AP2 domain containing protein
At1g17420	1.8539	lipoxygenase
At3g21670	1.8534	nitrate transporter
At1g67810	1.85073	hypothetical protein
At4g31550	1.84514	putaive DNA-binding protein DNA-binding protein WRKY3
At1g61340	1.84375	late embryogenesis abundant protein
At4g11280	1.84365	ACC synthase (AtACS-6)
At1g18570	1.84271	myb factor
At2g26690	1.8343	putative nitrate transporter
At2g38470	1.83283	putative WRKY-type DNA binding protein
At3g25180	1.83177	cytochrome P450 monooxygenase
At1g80840	1.82958	transcription factor, putative similar to WRKY transcription factor
At3g61190	1.82638	putative protein
At2g31945	1.82471	Expressed protein
At2g44460	1.82422	putative beta-glucosidase
At2g22200	1.82359	AP2 domain transcription factor
At1g18740	1.82274	unknown protein
At1g15010	1.82051	hypothetical protein
At3g10930	1.81687	hypothetical protein
At3g01970	1.81366	putative WRKY-like transcriptional regulator protein similar to WRKY1
At3g11840	1.81043	hypothetical protein
At3g05370	1.80842	putative disease resistance protein similar to Cf-2 disease resistance protein
At1g59590	1.79821	hypothetical protein
At3g57530	1.79674	calcium-dependent protein kinase
At2g30040	1.79417	putative protein kinase
At4g24110	1.79041	putative protein
At3g19580	1.78793	zinc finger protein
At2g39660	1.78252	putative protein kinase
At5g39020	1.77838	receptor protein kinase
At1g05000	1.77729	unkown protein
At3g14050	1.77725	putative GTP pyrophosphokinase
At4g37370	1.76878	cytochrome P450
At1g27730	1.76645	salt-tolerance zinc finger protein
At3g55980	1.76198	putative protein zinc finger transcription factor (PEI1)
At5g13700	1.75937	polyamine oxidase
At2g41010	1.75836	unknown protein
At2g27080	1.75482	unknown protein
At4g21850	1.75425	putative protein CGI-131 protein, Homo sapiens
At1g28190	1.75256	hypothetical protein
At3g23550	1.75164	unknown protein
At2g42760	1.7506	unknown protein
At4g08950	1.74782	putative phi-1-like phosphate-induced protein
At5g62360	1.74532	DC1.2 homologue
At2g47180	1.74379	putative galactinol synthase
At5g24660	1.74254	putative protein
At4g02200	1.74208	drought-induced-19-like 1
At2g30020	1.73881	putative protein phosphatase 2C
At3g19010	1.73705	hypothetical protein contains similarity to flavonol synthase (FLS)
At1g73480	1.73392	lysophospholipase homolog
At3g05320	1.7288	unknown protein
At1g72940	1.72764	disease resistance protein
At5g67450	1.72727	Cys2/His2-type zinc finger protein 1
At1g32900	1.72648	starch synthase
At1g11960	1.72643	unknown protein
At1g29690	1.72494	unknown protein
At4g38540	1.7136	monooxygenase 2 (MO2)
At1g18870	1.71322	isochorismate synthase
At5g65300	1.70802	unknown protein
At1g67470	1.7065	putative protein kinase
At2g27500	1.70276	putative beta-1,3-glucanase
At3g54150	1.70251	embryonic abundant protein
At1g21120	1.70008	putative ATPase
At5g46295	1.69566	Expressed protein
At4g39890	1.69446	small GTP-binding protein
At4g27654	1.69338	Expressed protein
At1g53885	1.68633	Expressed protein
At5g24590	1.68442	NAC2-like protein
At2g35980	1.68432	similar to harpin-induced protein hin1 from tobacco
At1g27770	1.68427	envelope Ca2+-ATPase
At5g50335	1.68191	Expressed protein
At3g09870	1.68184	hypothetical protein
At1g35140	1.68169	phosphate-induced (phi-1) protein
At1g63720	1.68085	hypothetical protein
At1g71030	1.67598	putative transcription factor similar to myb-related transcription factor 24
At1g57990	1.67401	unknown protein
At1g21910	1.67398	TINY-like protein
At4g18880	1.67189	heat shock transcription factor
At4g39670	1.67125	putative protein
At1g72920	1.66762	virus resistance protein
At1g20310	1.66459	hypothetical protein
At1g43000	1.66443	hypothetical protein
At1g73080	1.6575	receptor protein kinase
At5g19260	1.65443	putative protein
At4g24570	1.64672	putative mitochondrial uncoupling protein
At2g36220	1.64506	unknown protein
At3g48100	1.64351	response reactor 2 (ATRR2)
At1g70700	1.64287	hypothetical protein
At3g05400	1.64106	sugar transporter
At1g19180	1.64051	unknown protein
At5g11650	1.63913	lysophospholipase
At1g21010	1.63493	unknown protein ;supported by full-length cDNA: Ceres:17521.
At3g27210	1.634	unknown protein ; supported by cDNA: gi_15146182_gb_AY049232.1_
At1g66500	1.63255	hypothetical protein
At1g28370	1.62988	ethylene-responsive element binding factor
At5g52760	1.62745	putative protein
At5g58120	1.62473	resistance protein
At3g06890	1.62468	hypothetical protein
At4g37800	1.62464	endo-xyloglucan transferase - like protein
At5g28630	1.62184	putative protein retinal glutamic acid-rich protein
At1g70740	1.6205	putative protein kinase
At5g50800	1.61994	MtN3-like protein
At4g20780	1.61557	calcium-binding protein - like
At5g45820	1.61342	serine threonine protein kinase
At2g01180	1.61285	putative phosphatidic acid phosphatase
At1g20510	1.60981	hypothetical protein
At2g27690	1.60855	putative cytochrome P450
At2g02930	1.60455	putative glutathione S-transferase
At3g19350	1.59941	hypothetical protein similar to poly(A)-binding protein
At1g72450	1.59911	unknown protein
At4g01950	1.59602	predicted protein
At2g25460	1.59527	hypothetical protein
At2g24610	1.59481	putative cyclic nucleotide-regulated ion channel protein
At4g15975	1.59258	Expressed protein
At3g62260	1.5904	putative protein phosphoprotein phosphatase (EC 3.1.3.16) 1A-alpha - Homo sapiens
At1g19020	1.59031	Expressed protein
At5g46080	1.58855	serine/threonine protein kinase-like protein
At4g22780	1.58559	Translation factor EF-1 alpha - like protein
At5g62570	1.58521	putative protein contains similarity to calmodulin-binding protein
At3g50280	1.58066	anthranilate N-hydroxycinnamoyl/benzoyltransferase - like protein
At1g30040	1.57992	unknown protein
At5g26030	1.57932	ferrochelatase-I
At5g55120	1.5776	putative protein
At2g17040	1.57355	NAM (no apical meristem)-like protein
At4g02330	1.57007	hypothetical protein similar to pectinesterase
At2g32190	1.56954	unknown protein
At3g09020	1.56854	unknown protein
At4g33050	1.56723	putative protein
At4g25490	1.56506	transcriptional activator CBF1
At5g19470	1.5615	putative protein thiamin pyrophosphokinase
At5g52750	1.55992	putative protein
At5g66210	1.55875	calcium-dependent protein kinase
At5g39785	1.55867	Expressed protein
At2g39030	1.55606	unknown protein
At5g35735	1.55299	Expressed protein
At4g01870	1.55259	predicted protein
At1g19380	1.55236	hypothetical protein
At1g55920	1.55147	serine acetyltransferase
At2g01670	1.54987	unknown protein
At3g51970	1.54744	wax synthase-like protein
At1g33600	1.5472	hypothetical protein similar to putative disease resistance protein
At1g42990	1.54689	bZIP transcription factor
At3g44720	1.54664	putative chloroplast prephenate dehydratase
At3g62150	1.54579	P-glycoprotein-like proetin
At1g55450	1.54362	hypothetical protein similar to embryo-abundant protein
At3g49530	1.54337	NAC2-like protein
At1g28480	1.5428	glutaredoxin
At1g02660	1.54189	hypothetical protein
At4g39780	1.54164	AP2 domain containing protein RAP2.4
At4g37610	1.54158	putative protein SPOP, Homo sapiens
At5g08030	1.54132	glycerophosphodiester phosphodiesterase - like protein
At2g24100	1.54091	unknown protein
At5g46710	1.5399	putative protein
At5g47220	1.53503	ethylene responsive element binding factor 2 (ATERF2)
At5g46780	1.53414	putative protein
At3g44400	1.53387	disease resistence - like protein RPP1-WsA / WsC
At3g55840	1.53269	nematode resistance protein-like
At3g45640	1.53158	mitogen-activated protein kinase 3
At1g65490	1.53101	hypothetical protein
At1g59910	1.5292	hypothetical protein
At4g27652	1.52871	Expressed protein
At4g01250	1.52706	putative DNA-binding protein
At4g30270	1.52626	xyloglucan endo-1,4-beta-D-glucanase precursor
At2g47060	1.52616	putative protein kinase
At1g61890	1.52489	hypothetical protein
At3g10720	1.52351	putative pectinesterase
At4g29610	1.52247	cytidine deaminase 6 (CDA6)
At4g36550	1.52031	putative protein
At5g12940	1.5195	putative protein DRT100 protein precursor
At2g05540	1.51945	putative glycine-rich protein
At3g51450	1.51698	mucin -like protein hemomucin, Drosophila melanogaster
At3g44190	1.51625	putative protein dehydrogenases
At5g02200	1.51595	hypothetical protein
At5g07000	1.51528	steroid sulfotransferase-like protein
At1g26730	1.51401	putative aldehyde oxidase
At2g40140	1.51177	putative CCCH-type zinc finger protein
At4g36670	1.50995	sugar transporter like protein
At4g14365	1.50985	Expressed protein
At2g26560	1.50903	similar to latex allergen from Hevea brasiliensis
At4g34150	1.50859	putative protein hydroxyproline-rich glycoprotein precursor
At5g20230	1.50616	blue copper binding protein
At5g40460	1.5038	putative protein
At5g66070	1.50325	putative protein
At5g22380	1.50147	NAC-domain protein-like
B1/B2 < M1/M2 expression
At5g52300	0.171272	low-temperature-induced 65 kD protein
At1g52690	0.199615	late embryogenesis-abundant protein
At3g28220	0.247221	unknown protein
At1g07430	0.285724	protein phosphatase 2C
At3g57260	0.322758	beta-1,3-glucanase 2 (BG2) (PR-2)
At3g02480	0.342803	unknown protein similar to pollen coat protein
At5g43840	0.348222	heat shock transcription factor-like protein
At2g47770	0.357561	unknown protein
At5g59320	0.366543	nonspecific lipid-transfer protein precursorCeres:7828.
At5g59310	0.367155	nonspecific lipid-transfer protein precursor
At3g45860	0.390364	protein kinase
At5g59670	0.391242	serine/threonine-specific protein kinase
At4g33550	0.395242	putative protein
At5g43780	0.396926	ATP sulfurylase precursor
At2g42540	0.413503	cold-regulated protein cor15a precursor
At5g06760	0.422552	late embryogenesis abundant protein LEA like
At2g37870	0.431552	hypothetical protein
At5g10760	0.432196	nucleoid DNA-binding protein cnd41
At1g02205	0.432575	hypothetical protein contains similarity to lipid transfer protein
At4g38840	0.450469	auxin-induced protein
At4g05100	0.452244	MYB - like protein cM4 myb transcription factor
At1g49200	0.464404	RING-H2 finger protein RHA3a
At5g66400	0.466307	dehydrin RAB18-like protein
At3g62950	0.467192	glutaredoxin -like protein
At4g31730	0.472873	hypothetical protein
At1g64110	0.476833	unknown protein
At3g22830	0.48259	putative heat shock protein
At1g02200	0.486238	receptor-like protein glossy1 (gl1)
At3g29575	0.496629	hypothetical protein
At3g23110	0.498901	disease resistance protein
At4g10500	0.4998	putative Fe(II)/ascorbate oxidase SRG1 protein
At1g29430	0.501851	auxin-induced protein
At5g59220	0.514123	protein phosphatase 2C
At2g18570	0.515807	putative flavonol 3-O-glucosyltransferase
At1g16850	0.524644	unknown protein
At5g10930	0.52575	serine/threonine protein kinase
At2g44130	0.536591	unknown protein
At1g18710	0.545125	Myb-related transcription factor
At3g25190	0.545695	integral membrane protein
At5g57785	0.546227	Expressed protein
At1g13470	0.550217	hypothetical protein
At3g13672	0.566615	seven in absentia-like protein similar to SINA1p
At3g61890	0.573274	homeobox-leucine zipper protein ATHB-12
At4g34760	0.575173	putative auxin-regulated protein
At1g62510	0.581528	similar to 14KD proline-rich protein
At2g24160	0.583748	putative disease resistance protein
At3g59940	0.584377	putative protein
At1g80290	0.585603	hypothetical protein
At5g45000	0.588494	putative protein contains similarity to disease resistance protein
At1g30260	0.588612	hypothetical protein
At2g32100	0.590117	hypothetical protein
At5g52310	0.59081	low-temperature-induced protein 78
At1g29510	0.59641	auxin-induced protein
At1g14440	0.59649	hypothetical protein
At5g37260	0.597029	putative protein DNA-binding protein CCA1
At3g48080	0.600792	hypothetical protein
At5g54610	0.60217	ankyrin-repeat-containing protein-like
At2g24850	0.613148	putative tyrosine aminotransferase
At2g20670	0.623814	unknown protein
At1g35710	0.624097	protein kinase
At3g14530	0.626311	putative geranylgeranyl pyrophosphate synthase GGPS3
At1g26920	0.627368	unknown protein
At5g04820	0.628581	putative protein
At1g14280	0.628934	phytochrome kinase substrate 1
At4g28240	0.631565	putative wound induced protein
At2g04050	0.632658	hypothetical protein
At1g76960	0.634367	unknown protein
At2g42530	0.636686	cold-regulated protein cor15b precursor
At2g18050	0.637039	histone H1
At3g11010	0.638081	putative disease resistance protein
At3g57520	0.643892	imbibition protein
At2g22840	0.653059	unknown protein
At3g24520	0.653914	heat shock transcription factor HSF1
At2g47000	0.654144	putative ABC transporter related to multi drug resistance proteins and P-glycoproteins
At3g62780	0.654166	shock protein SRC2-like
At3g51440	0.655589	mucin -like protein hemomucin, Drosophila melanogaster
At3g11340	0.659027	glucosyl transferase
At3g58070	0.663419	zinc finger-like protein
At3g05650	0.664657	putative disease resistance protein
At1g05340	0.66478	unknown protein

## Sheet: Table S2
Table S2 Genes showing differential expression between big and medium sized F1 plants and upregulation in C24/Col and C24/Ler hybrids
	Fold change (B1&B2/M1&M2)	Description of genes
At1g12610	3.892	DWARF AND DELAYED FLOWERING 1 (DDF1)
At4g34410	3.78742	redox responsive transcription factor 1 (RRTF1)
At5g42380	3.21591	calmodulin like 37 (CML37)
At2g22880	3.14391	VQ motif-containing protein
At4g30280	2.78228	xyloglucan endotransglucosylase/hydrolase 18 (XTH18)
At3g26200	2.71667	cytochrome P450, family 71, subfamily B, polypeptide 22 (CYP71B22)
At1g66160	2.59515	CYS, MET, PRO, and GLY protein 1 (CMPG1)
At2g35930	2.58662	plant U-box 23 (PUB23)
At2g25735	2.56402	unknown protein
At5g47230	2.45774	ethylene responsive element binding factor 5 (ERF5)
At1g58420	2.38634	unknown protein
At4g17490	2.35072	ethylene responsive element binding factor 6 (ERF6)
At5g56980	2.31511	unknown protein
At2g26530	2.30457	AR781, similar to yeast pheromone receptor
At5g45340	2.24932	cytochrome P450, family 707, subfamily A, polypeptide 3 (CYP707A3)
At5g57220	2.24166	cytochrome P450, family 81, subfamily F, polypeptide 2 (CYP81F2)
At5g64660	2.24101	CYS, MET, PRO, and GLY protein 2 (CMPG2)
At5g66650	2.22508	unknown protein
At2g24600	2.17642	Ankyrin repeat family protein
At1g56660	2.16778	unknown protein
At3g48520	2.16641	cytochrome P450, family 94, subfamily B, polypeptide 3 (CYP94B3)
At4g29780	2.12458	unknown protein
At1g76650	2.02059	calmodulin-like 38 (CML38)
At5g51190	2.00956	ERF105
At1g76600	1.99393	unknown protein
At1g74450	1.99088	unknown protein
At1g69890	1.9845	unknown protein
At5g17350	1.984	unknown protein
At3g28340	1.91304	galacturonosyltransferase-like 10 (GATL10)
At1g74930	1.85447	ORA47
At1g61340	1.84375	F-box family protein
At2g38470	1.83283	WRKY33
At1g80840	1.82958	WRKY40
At1g18740	1.82274	unknown protein
At1g15010	1.82051	unknown protein
At3g19580	1.78793	zinc-finger protein 2 (ZF2)
At1g27730	1.76645	salt tolerance zinc finger (STZ)
At3g55980	1.76198	salt-inducible zinc finger 1 (SZF1)
At2g27080	1.75482	Late embryogenesis abundant (LEA) hydroxyproline-rich glycoprotein family
At1g29690	1.72494	constitutively activated cell death 1 (CAD1)
At4g27654	1.69338	unknown protein
At5g24590	1.68442	TCV-interacting protein (TIP)
At1g35140	1.68169	PHOSPHATE-INDUCED 1 (PHI-1)
At1g57990	1.67401	purine permease 18 (PUP18)
At4g24570	1.64672	dicarboxylate carrier 2 (DIC2)
At2g36220	1.64506	unknown protein
At3g48100	1.64351	response regulator 5 (RR5)
At1g28370	1.62988	ERF domain protein 11 (ERF11)
At5g28630	1.62184	glycine-rich protein
At1g19020	1.59031	unknown protein
At4g25490	1.56506	C-repeat/DRE binding factor 1 (CBF1)
At5g35735	1.55299	Auxin-responsive family protein
At1g19380	1.55236	unknown protein
At1g33600	1.5472	Leucine-rich repeat (LRR) family protein
At1g55450	1.54362	S-adenosyl-L-methionine-dependent methyltransferases superfamily protein
At4g37610	1.54158	BTB and TAZ domain protein 5 (BT5)
At5g46710	1.5399	PLATZ transcription factor family protein
At3g10720	1.52351	Plant invertase/pectin methylesterase inhibitor superfamily
At2g40140	1.51177	salt-inducible zinc finger 2 (SZF2)
At4g36670	1.50995	Major facilitator superfamily protein
At5g20230	1.50616	blue-copper-binding protein (BCB)

## Sheet: Table S3
Table S3 Validation of microarray expression data by quantitative RT-PCR
		Quantitative real time PCR result					Array
		Fold change (B1&B2/M1&M2)					Fold change (B1&B2/M1&M2)
	Locus	M1&M2	SE	B1&B2	SE		M1&M2	SE	B1&B2	SE
B1&B2 > M1&M2	At1g17380	1	0.0688209	1.66168	0.24905		1	0.171638	2.745	0.73998
	At1g33760	1	0.177892	1.83227	0.184803		1	0.216563	2.09576	0.0961218
	At1g66090	1	0.115414	1.74022	0.271345		1	0.0300445	2.56449	0.518783
	At3g23250	1	0.204719	3.37845	0.538155		1	0.308839	6.08621	2.25491
	At3g47420	1	0.0942272	1.59424	0.292284		1	0.167727	2.8137	1.31057
	At4g30280	1	0.0652618	2.47867	0.369815		1	0.052671	3.08216	1.33421
	At5g42380	1	0.0978504	2.54174	0.299012		1	0.0800912	3.23817	0.458277
	At5g45340	1	0.134659	1.41496	0.0624075		1	0.304179	2.14514	0.101544
	At5g47230	1	0.139121	1.73744	0.012072		1	0.289028	2.35857	0.164113
	At5g51190	1	0.0709991	1.699	0.0539806		1	0.087441	2.0019	0.0124751
	At5g59730	1	0.0808203	2.01504	0.230594		1	0.133669	2.2083	0.611582
	At5g62520	1	0.103601	2.5315	0.374763		1	0.114342	3.29998	1.28402
	At5g66640	1	0.0349116	2.60431	0.453727		1	0.0762761	2.13101	0.641586
B1&B2 < M1&M2	At1g02205	1	0.0787271	0.461426	0.00527367		1	0.243921	0.420641	0.0308417
	At1g07430	1	0.141393	0.403309	0.0376185		1	0.207666	0.294609	0.0931494
	At1g52690	1	0.179226	0.261267	0.0270779		1	0.359319	0.186933	0.0155665
	At2g42540	1	0.0859845	0.409671	0.0100012		1	0.0800327	0.413907	0.0378062
	At3g22830	1	0.155156	0.569938	0.00626156		1	0.0125036	0.484851	0.0471642
	At4g05100	1	0.150033	0.564105	0.0593014		1	0.17419	0.447134	0.0401171
	At4g33550	1	0.070652	0.519732	0.0202144		1	0.177976	0.42379	0.168316
	At5g43780	1	0.119948	0.489951	0.0371835		1	0.122456	0.39411	0.0116384
	At5g43840	1	0.192604	0.231013	0.0143213		1	0.204387	0.340967	0.00808633
	At5g52300	1	0.105191	0.239769	0.0283321		1	0.054099	0.174093	0.0325553
	At5g59320	1	0.116103	0.538575	0.0595624		1	0.100108	0.375114	0.0877695
SE, standard error

## Sheet: Table S4
Table S4 Classification of gene expression pattern in big and medium sized F1 plants
	Fold change divided with expression levels of M1-3
Locus	M1-3	B1	B2	B3	B4	B5
Class-I (B1&B2 > M1-3)
At1g17380	1.00±0.10	2.16325	1.27651	0.966779	0.763104	0.608036
At1g66090	1.00±0.10	2.42306	1.39867	0.960276	0.985561	0.960504
At3g47420	1.00±0.10	1.73623	1.32543	0.924345	1.21246	0.632675
At5g45340	1.00±0.095	1.51035	1.46146	1.11131	0.467152	0.463004
Class-II (B1-3 > M1-3)
At1g33760	1.00±0.16	2.46442	1.74104	1.32602	0.758608	0.463741
At3g23250	1.00±0.17	4.69307	2.66342	1.61458	0.787452	0.521184
At4g30280	1.00±0.055	3.08069	1.82195	1.27554	0.824669	0.532282
At5g42380	1.00±0.14	3.39049	2.56898	1.35909	0.422727	0.337306
At5g47230	1.00±0.096	1.79134	1.78147	1.25293	0.434786	0.338387
At5g51190	1.00±0.069	1.88503	1.69148	1.41913	0.538515	0.356897
At5g59730	1.00±0.063	2.53644	1.70615	1.40225	0.829459	0.718874
Class-III (B1-4 > M1-3)
At5g62520	1.00±0.21	4.11746	2.44599	2.14316	1.45568	0.53248
Class-IV (B1-5 > M1-3)
At5g66640	1.00±0.055	3.14306	1.68589	1.28133	1.33642	1.31742
Class-V (B1&B2 < M1-3)
At5g43780	1.00±0.085	0.54	0.49	0.82	0.84	0.89
Class-VI (B1-3 < M1-3)
At2g42540	1.00±0.056	0.395864	0.43	0.44	0.86	0.81
At4g33550	1.00±0.077	0.55	0.58	0.67	1.18	0.85
At5g52300	1.00±0.080	0.3	0.2	0.41	0.84	0.54
At5g59320	1.00±0.11	0.5	0.7	0.73	1.11	1.05
Class-VII (B1-4 < M1-3)
At1g07430	1.00±0.091	0.36	0.46	0.66	0.67	1.1
At4g05100	1.00±0.12	0.54	0.7	0.7	0.67	1.3
Class-VIII (B1-5 < M1-3)
At1g02205	1.00±0.055	0.47	0.45	0.53	0.61	0.59
At1g52690	1.00±0.14	0.25	0.33	0.53	0.37	0.64
At3g22830	1.00±0.13	0.63	0.63	0.58	0.35	0.53
At5g43840	1.00±0.13	0.23	0.23	0.49	0.64	0.73

## Sheet: Table S5
Table S5 Comparison of gene expression levels between big and medium sized F2 plants
	Fold change (BF2/MF2) (1st set)						Fold change (BF2/M-F2) (2nd set)
	M-F2	SE	B-F2	SE			M-F2	SE	B-F2	SE
B1&B2 > M1&M2
At1g16370	1	0.0821279	1.12606	0.080286			1	0.0947387	1.48248	0.0712504	**
At1g17380	1	0.258773	1.3508	0.192545			1	0.14905	1.37426	0.238866
At1g33760	1	0.419504	0.582651	0.086494			1	0.246416	1.69483	0.377369
At1g66090	1	0.171211	1.45748	0.0451704	*		1	0.0813589	2.20882	0.239846	**
At3g23250	1	0.269584	2.02386	0.572165			1	0.158472	4.71135	0.997126	**
At4g30280	1	0.189698	2.18593	0.22622	**		1	0.154559	3.02265	0.828329	*
At5g42380	1	0.122061	1.66057	0.281427			1	0.153815	3.91437	0.971664	*
At3g47420	1	0.173572	4.3966	0.30366	**		1	0.376655	3.09868	0.719323	**
At5g45340	1	0.11865	0.853898	0.0825417			1	0.0998917	1.01084	0.0921639
At5g47230	1	0.20209	2.59436	0.248424	**		1	0.141226	2.56914	0.638492	*
At5g51190	1	0.181397	0.956747	0.0638912			1	0.175788	1.03513	0.175306
At5g59730	1	0.161336	1.7163	0.117497	**		1	0.116474	1.94162	0.131009	**
At5g62520	1	0.23	1.99	0.15	**		1	0.22	0.82	0.12
At5g66640	1	0.190196	1.66092	0.235199			1	0.187919	3.20015	0.93244	*
B1&B2 < M1&M2
At1g02205	1	0.347646	0.423474	0.0625419			1	0.263987	0.666448	0.0739542
At1g07430	1	0.195657	0.628435	0.125666			1	0.172684	0.606768	0.0745596
At1g52690	1	0.37385	0.342261	0.0755967			1	0.190108	0.743968	0.170536
At2g42540	1	0.220729	0.745345	0.248126			1	0.329497	0.254346	0.0153406	*
At3g22830	1	0.46814	0.331589	0.0833246			1	0.183551	0.486093	0.0576039	*
At4g07430	1	0.208009	0.785904	0.107882			1	0.149705	1.35367	0.331898
At4g38840	1	0.151368	0.545569	0.0788533	*		1	0.134134	0.978929	0.115625
At5g43780	1	0.0707283	0.80355	0.120142			1	0.0967964	0.755588	0.0649992
At5g43840	1	0.198534	0.456536	0.0834959	*		1	0.213981	0.297126	0.0680798	*
At5g52300	1	0.179329	0.409742	0.0992725	*		1	0.213278	0.220952	0.074632	**
At5g59320	1	0.231192	0.313151	0.0280778	*		1	0.0281141	0.959202	0.0860009
SE, standard error
*, p < 0.05; **, p < 0.01

## Sheet: Table S6
Table S6 GO function term overrepresented in genes showing B1&B2 > M1&M2 expression
GO accession	Term type	Term	p value	FDR
GO:0010200	P	response to chitin	1.3e-114	3.3e-111
GO:0009743	P	response to carbohydrate stimulus	1.1e-77	1.3e-74
GO:0002679	P	respiratory burst during defense response	9.8e-65	6.1e-62
GO:0045730	P	respiratory burst	9.8e-65	6.1e-62
GO:0010033	P	response to organic substance	1.5e-60	7.5e-58
GO:0009753	P	response to jasmonic acid stimulus	5.2e-55	2.2e-52
GO:0006952	P	defense response	8.4e-52	3e-49
GO:0009620	P	response to fungus	1.9e-50	6.1e-48
GO:0045087	P	innate immune response	6.1e-50	1.7e-47
GO:0002376	P	immune system process	1e-49	2.4e-47
GO:0006955	P	immune response	1e-49	2.4e-47
GO:0009723	P	response to ethylene stimulus	3.2e-49	6.6e-47
GO:0042221	P	response to chemical stimulus	2.6e-47	5.1e-45
GO:0009719	P	response to endogenous stimulus	7.3e-47	1.3e-44
GO:0009611	P	response to wounding	2.2e-45	3.7e-43
GO:0009692	P	ethylene metabolic process	7.2e-45	1.1e-42
GO:0009693	P	ethylene biosynthetic process	7.2e-45	1.1e-42
GO:0043449	P	cellular alkene metabolic process	2e-44	2.7e-42
GO:0043450	P	alkene biosynthetic process	2e-44	2.7e-42
GO:0070887	P	cellular response to chemical stimulus	2.8e-44	3.5e-42
GO:0071310	P	cellular response to organic substance	3.4e-44	4e-42
GO:0071495	P	cellular response to endogenous stimulus	9.3e-43	1.1e-40
GO:0002252	P	immune effector process	3.6e-42	3.9e-40
GO:0006950	P	response to stress	4.2e-42	4.3e-40
GO:0050832	P	defense response to fungus	4.9e-41	4.9e-39
GO:0007242	P	intracellular signaling cascade	5.8e-39	5.6e-37
GO:0023052	P	signaling	1.8e-37	1.7e-35
GO:0051716	P	cellular response to stimulus	3.1e-36	2.8e-34
GO:0080134	P	regulation of response to stress	6.5e-36	5.7e-34
GO:0031347	P	regulation of defense response	1e-35	8.5e-34
GO:0007165	P	signal transduction	1.9e-35	1.5e-33
GO:0080135	P	regulation of cellular response to stress	1.9e-35	1.5e-33
GO:0009605	P	response to external stimulus	2.5e-35	1.9e-33
GO:0009867	P	jasmonic acid mediated signaling pathway	4.2e-35	2.7e-33
GO:0002682	P	regulation of immune system process	4e-35	2.7e-33
GO:0050896	P	response to stimulus	3.8e-35	2.7e-33
GO:0071395	P	cellular response to jasmonic acid stimulus	4.2e-35	2.7e-33
GO:0010363	P	regulation of plant-type hypersensitive response	4.2e-35	2.7e-33
GO:0050776	P	regulation of immune response	4e-35	2.7e-33
GO:0006612	P	protein targeting to membrane	1.3e-34	7.9e-33
GO:0009738	P	abscisic acid mediated signaling pathway	3e-34	1.8e-32
GO:0045088	P	regulation of innate immune response	3.2e-34	1.9e-32
GO:0043067	P	regulation of programmed cell death	3.5e-34	2e-32
GO:0009626	P	plant-type hypersensitive response	1e-33	5.8e-32
GO:0010941	P	regulation of cell death	1.2e-33	6.8e-32
GO:0034050	P	host programmed cell death induced by symbiont	1.3e-33	7.2e-32
GO:0023034	P	intracellular signaling pathway	4.5e-33	2.4e-31
GO:0071215	P	cellular response to abscisic acid stimulus	4.6e-33	2.4e-31
GO:0023046	P	signaling process	5.2e-33	2.6e-31
GO:0023060	P	signal transmission	5.2e-33	2.6e-31
GO:0051707	P	response to other organism	1.5e-32	7.1e-31
GO:0009607	P	response to biotic stimulus	2.6e-32	1.3e-30
GO:0009751	P	response to salicylic acid stimulus	4.3e-32	2.1e-30
GO:0012501	P	programmed cell death	1.1e-31	4.9e-30
GO:0006555	P	methionine metabolic process	5.3e-31	2.4e-29
GO:0009863	P	salicylic acid mediated signaling pathway	6.8e-31	3e-29
GO:0071446	P	cellular response to salicylic acid stimulus	6.8e-31	3e-29
GO:0048583	P	regulation of response to stimulus	1e-30	4.4e-29
GO:0023033	P	signaling pathway	1.2e-30	4.9e-29
GO:0009755	P	hormone-mediated signaling pathway	9.7e-30	4.1e-28
GO:0008219	P	cell death	3.5e-29	1.4e-27
GO:0016265	P	death	3.5e-29	1.4e-27
GO:0009725	P	response to hormone stimulus	8.2e-29	3.3e-27
GO:0009737	P	response to abscisic acid stimulus	6.8e-28	2.7e-26
GO:0032870	P	cellular response to hormone stimulus	7.6e-28	2.9e-26
GO:0009066	P	aspartate family amino acid metabolic process	9.6e-28	3.6e-26
GO:0043069	P	negative regulation of programmed cell death	9.3e-26	3.5e-24
GO:0060548	P	negative regulation of cell death	2e-25	7.2e-24
GO:0042398	P	cellular amino acid derivative biosynthetic process	2.7e-25	9.7e-24
GO:0051704	P	multi-organism process	2.7e-25	9.8e-24
GO:0031407	P	oxylipin metabolic process	7.3e-25	2.6e-23
GO:0033554	P	cellular response to stress	8.2e-25	2.8e-23
GO:0009694	P	jasmonic acid metabolic process	2.8e-24	9.5e-23
GO:0006575	P	cellular amino acid derivative metabolic process	7.8e-24	2.6e-22
GO:0042538	P	hyperosmotic salinity response	1.8e-23	5.9e-22
GO:0009873	P	ethylene mediated signaling pathway	9.6e-23	3.2e-21
GO:0052542	P	callose deposition during defense response	3.5e-22	1.2e-20
GO:0030968	P	endoplasmic reticulum unfolded protein response	3.7e-22	1.2e-20
GO:0034620	P	cellular response to unfolded protein	5.2e-22	1.6e-20
GO:0006986	P	response to unfolded protein	5.2e-22	1.6e-20
GO:0071445	P	cellular response to protein stimulus	9.9e-22	3.1e-20
GO:0042180	P	cellular ketone metabolic process	1.1e-21	3.5e-20
GO:0006984	P	ER-nuclear signaling pathway	1.4e-21	4.1e-20
GO:0050794	P	regulation of cellular process	1.5e-21	4.5e-20
GO:0043436	P	oxoacid metabolic process	1.7e-21	5.1e-20
GO:0019752	P	carboxylic acid metabolic process	1.7e-21	5.1e-20
GO:0071216	P	cellular response to biotic stimulus	1.9e-21	5.3e-20
GO:0006082	P	organic acid metabolic process	1.9e-21	5.3e-20
GO:0044283	P	small molecule biosynthetic process	2.3e-21	6.5e-20
GO:0000160	P	two-component signal transduction system (phosphorelay)	5.7e-21	1.6e-19
GO:0031408	P	oxylipin biosynthetic process	7.7e-21	2.1e-19
GO:0031348	P	negative regulation of defense response	1.2e-20	3.4e-19
GO:0071369	P	cellular response to ethylene stimulus	1.6e-20	4.2e-19
GO:0009695	P	jasmonic acid biosynthetic process	4.2e-20	1.1e-18
GO:0007243	P	protein kinase cascade	1.2e-19	3.1e-18
GO:0009862	P	systemic acquired resistance, salicylic acid mediated signaling pathway	1.6e-19	4.1e-18
GO:0000165	P	MAPKKK cascade	1.7e-19	4.5e-18
GO:0000096	P	sulfur amino acid metabolic process	2.4e-19	6e-18
GO:0006790	P	sulfur metabolic process	1.2e-18	3e-17
GO:0052545	P	callose localization	1.8e-18	4.5e-17
GO:0009414	P	response to water deprivation	2e-18	4.9e-17
GO:0009612	P	response to mechanical stimulus	2.6e-18	6.4e-17
GO:0033037	P	polysaccharide localization	2.8e-18	6.7e-17
GO:0009814	P	defense response, incompatible interaction	3.1e-18	7.4e-17
GO:0009415	P	response to water	3.2e-18	7.7e-17
GO:0050789	P	regulation of biological process	9.5e-18	2.3e-16
GO:0006605	P	protein targeting	2.3e-17	5.4e-16
GO:0048585	P	negative regulation of response to stimulus	4.5e-17	1e-15
GO:0009628	P	response to abiotic stimulus	6.9e-17	1.6e-15
GO:0006972	P	hyperosmotic response	7.9e-17	1.8e-15
GO:0009627	P	systemic acquired resistance	1.9e-15	4.3e-14
GO:0034613	P	cellular protein localization	6.2e-15	1.4e-13
GO:0070727	P	cellular macromolecule localization	7e-15	1.6e-13
GO:0033036	P	macromolecule localization	7.5e-15	1.6e-13
GO:0006520	P	cellular amino acid metabolic process	8.2e-15	1.8e-13
GO:0006886	P	intracellular protein transport	1.3e-14	2.9e-13
GO:0006519	P	cellular amino acid and derivative metabolic process	2.7e-14	5.8e-13
GO:0044106	P	cellular amine metabolic process	2.7e-14	5.8e-13
GO:0034976	P	response to endoplasmic reticulum stress	3e-14	6.4e-13
GO:0065007	P	biological regulation	4.5e-14	9.4e-13
GO:0045184	P	establishment of protein localization	7.5e-14	1.5e-12
GO:0015031	P	protein transport	7.5e-14	1.5e-12
GO:0008104	P	protein localization	9e-14	1.8e-12
GO:0051789	P	response to protein stimulus	2.5e-13	5.1e-12
GO:0006970	P	response to osmotic stress	2.6e-13	5.2e-12
GO:0048519	P	negative regulation of biological process	3.9e-13	7.7e-12
GO:0080010	P	regulation of oxygen and reactive oxygen species metabolic process	4.3e-13	8.4e-12
GO:0010310	P	regulation of hydrogen peroxide metabolic process	4.3e-13	8.4e-12
GO:0009651	P	response to salt stress	5.6e-13	1.1e-11
GO:0009308	P	amine metabolic process	6.4e-13	1.2e-11
GO:0009696	P	salicylic acid metabolic process	7.7e-13	1.5e-11
GO:0042742	P	defense response to bacterium	9.2e-13	1.8e-11
GO:0032787	P	monocarboxylic acid metabolic process	1.8e-12	3.5e-11
GO:0006633	P	fatty acid biosynthetic process	2.3e-12	4.2e-11
GO:0048523	P	negative regulation of cellular process	4.9e-12	9.1e-11
GO:0044281	P	small molecule metabolic process	9.1e-12	1.7e-10
GO:0046394	P	carboxylic acid biosynthetic process	1.3e-11	2.3e-10
GO:0016053	P	organic acid biosynthetic process	1.3e-11	2.3e-10
GO:0009697	P	salicylic acid biosynthetic process	2.5e-11	4.5e-10
GO:0031323	P	regulation of cellular metabolic process	5.4e-11	9.6e-10
GO:0034641	P	cellular nitrogen compound metabolic process	5.8e-11	1e-09
GO:0009595	P	detection of biotic stimulus	6.9e-11	1.2e-09
GO:0006631	P	fatty acid metabolic process	7.5e-11	1.3e-09
GO:0046907	P	intracellular transport	7.8e-11	1.4e-09
GO:0009617	P	response to bacterium	8.1e-11	1.4e-09
GO:0051641	P	cellular localization	4.3e-10	7.4e-09
GO:0043900	P	regulation of multi-organism process	5.8e-10	9.9e-09
GO:0042743	P	hydrogen peroxide metabolic process	6.6e-10	1.1e-08
GO:0051649	P	establishment of localization in cell	7.4e-10	1.2e-08
GO:0019222	P	regulation of metabolic process	9.4e-10	1.6e-08
GO:0006800	P	oxygen and reactive oxygen species metabolic process	1.4e-09	2.4e-08
GO:0006725	P	cellular aromatic compound metabolic process	2.1e-09	3.5e-08
GO:0019438	P	aromatic compound biosynthetic process	3.2e-09	5.2e-08
GO:0051606	P	detection of stimulus	7.2e-09	1.2e-07
GO:0051179	P	localization	2.1e-08	3.5e-07
GO:0031326	P	regulation of cellular biosynthetic process	2.2e-08	3.6e-07
GO:0009889	P	regulation of biosynthetic process	2.3e-08	3.7e-07
GO:0009266	P	response to temperature stimulus	3.7e-08	5.9e-07
GO:0010286	P	heat acclimation	3.7e-08	5.9e-07
GO:0009733	P	response to auxin stimulus	4.3e-08	6.8e-07
GO:0009625	P	response to insect	5.7e-08	8.9e-07
GO:0009646	P	response to absence of light	7.2e-08	1.1e-06
GO:0009409	P	response to cold	1e-07	1.6e-06
GO:0009058	P	biosynthetic process	1.1e-07	1.7e-06
GO:0044255	P	cellular lipid metabolic process	1.5e-07	2.3e-06
GO:0044249	P	cellular biosynthetic process	1.6e-07	2.4e-06
GO:0080090	P	regulation of primary metabolic process	2.1e-07	3.1e-06
GO:0006979	P	response to oxidative stress	5.1e-07	7.5e-06
GO:0006355	P	regulation of transcription, DNA-dependent	7.3e-07	1.1e-05
GO:0045449	P	regulation of transcription	7.7e-07	1.1e-05
GO:0006810	P	transport	8.1e-07	1.2e-05
GO:0051252	P	regulation of RNA metabolic process	8.4e-07	1.2e-05
GO:0010556	P	regulation of macromolecule biosynthetic process	8.5e-07	1.2e-05
GO:0009408	P	response to heat	1e-06	1.5e-05
GO:0061025	P	membrane fusion	1.1e-06	1.6e-05
GO:0006944	P	cellular membrane fusion	1.1e-06	1.6e-05
GO:0001666	P	response to hypoxia	1.6e-06	2.3e-05
GO:0071456	P	cellular response to hypoxia	1.7e-06	2.4e-05
GO:0051234	P	establishment of localization	1.8e-06	2.5e-05
GO:0044237	P	cellular metabolic process	1.8e-06	2.6e-05
GO:0008610	P	lipid biosynthetic process	2e-06	2.7e-05
GO:0006629	P	lipid metabolic process	2.2e-06	3e-05
GO:0070482	P	response to oxygen levels	2.3e-06	3.2e-05
GO:0010193	P	response to ozone	2.6e-06	3.6e-05
GO:0009987	P	cellular process	2.7e-06	3.7e-05
GO:0019219	P	regulation of nucleobase, nucleoside, nucleotide and nucleic acid metabolic process	3.1e-06	4.2e-05
GO:0051171	P	regulation of nitrogen compound metabolic process	4e-06	5.3e-05
GO:0071453	P	cellular response to oxygen levels	4e-06	5.3e-05
GO:0010468	P	regulation of gene expression	4.4e-06	5.8e-05
GO:0006351	P	transcription, DNA-dependent	6e-06	7.9e-05
GO:0006350	P	transcription	6.1e-06	8e-05
GO:0032774	P	RNA biosynthetic process	6.2e-06	8.1e-05
GO:0009581	P	detection of external stimulus	1.3e-05	0.00017
GO:0008152	P	metabolic process	1.6e-05	0.0002
GO:0060255	P	regulation of macromolecule metabolic process	1.7e-05	0.00022
GO:0002237	P	response to molecule of bacterial origin	2.1e-05	0.00026
GO:0006807	P	nitrogen compound metabolic process	3e-05	0.00038
GO:0007154	P	cell communication	3.6e-05	0.00045
GO:0009991	P	response to extracellular stimulus	4.5e-05	0.00056
GO:0009963	P	positive regulation of flavonoid biosynthetic process	4.5e-05	0.00056
GO:0031667	P	response to nutrient levels	4.6e-05	0.00057
GO:0015824	P	proline transport	5.7e-05	0.00071
GO:0009642	P	response to light intensity	8.2e-05	0.001
GO:0031668	P	cellular response to extracellular stimulus	8.2e-05	0.001
GO:0031669	P	cellular response to nutrient levels	8.5e-05	0.001
GO:0044238	P	primary metabolic process	8.8e-05	0.0011
GO:0071496	P	cellular response to external stimulus	8.8e-05	0.0011
GO:0015804	P	neutral amino acid transport	9.7e-05	0.0012
GO:0043455	P	regulation of secondary metabolic process	0.00016	0.0019
GO:0016036	P	cellular response to phosphate starvation	0.00016	0.0019
GO:0009962	P	regulation of flavonoid biosynthetic process	0.00018	0.0021
GO:0019374	P	galactolipid metabolic process	0.00032	0.0037
GO:0019375	P	galactolipid biosynthetic process	0.00032	0.0037
GO:0009247	P	glycolipid biosynthetic process	0.00041	0.0048
GO:0006664	P	glycolipid metabolic process	0.00059	0.0068
GO:0048653	P	anther development	0.00072	0.0083
GO:0009267	P	cellular response to starvation	0.00074	0.0086
GO:0031325	P	positive regulation of cellular metabolic process	0.00091	0.01
GO:0042594	P	response to starvation	0.00096	0.011
GO:0009893	P	positive regulation of metabolic process	0.001	0.012
GO:0042434	P	indole derivative metabolic process	0.0013	0.015
GO:0042430	P	indole and derivative metabolic process	0.0013	0.015
GO:0019748	P	secondary metabolic process	0.0015	0.017
GO:0009813	P	flavonoid biosynthetic process	0.0031	0.035
GO:0061024	P	membrane organization	0.0033	0.037
GO:0016044	P	cellular membrane organization	0.0033	0.037
GO:0009891	P	positive regulation of biosynthetic process	0.0035	0.038
GO:0031328	P	positive regulation of cellular biosynthetic process	0.0035	0.038
GO:0007568	P	aging	0.0045	0.049
GO:0034645	P	cellular macromolecule biosynthetic process	0.0045	0.049
P, Biological process

## Sheet: Table S7
Table S7 GO function term overrepresented in genes showing B1&B2 < M1&M2 expression
GO accession	Term type	Term	p value	FDR
GO:0009414	P	response to water deprivation	6.8e-13	4.2e-10
GO:0009415	P	response to water	8.5e-13	4.2e-10
GO:0009719	P	response to endogenous stimulus	6e-12	2e-09
GO:0009725	P	response to hormone stimulus	7.1e-11	1.8e-08
GO:0009737	P	response to abscisic acid stimulus	1.1e-10	2.1e-08
GO:0010033	P	response to organic substance	4.7e-09	7.8e-07
GO:0042221	P	response to chemical stimulus	1.6e-08	2.3e-06
GO:0042538	P	hyperosmotic salinity response	1.9e-08	2.4e-06
GO:0050896	P	response to stimulus	7.1e-08	7.8e-06
GO:0006970	P	response to osmotic stress	9.5e-08	9.4e-06
GO:0010150	P	leaf senescence	1.1e-07	9.7e-06
GO:0006950	P	response to stress	1.3e-07	1.1e-05
GO:0009651	P	response to salt stress	2.6e-07	2e-05
GO:0010149	P	senescence	4.1e-07	2.7e-05
GO:0010260	P	organ senescence	4.1e-07	2.7e-05
GO:0006972	P	hyperosmotic response	1.1e-06	7.1e-05
GO:0007165	P	signal transduction	3.7e-06	0.0002
GO:0006952	P	defense response	3.6e-06	0.0002
GO:0071495	P	cellular response to endogenous stimulus	3.7e-06	0.0002
GO:0009628	P	response to abiotic stimulus	4.5e-06	0.00022
GO:0009753	P	response to jasmonic acid stimulus	6.4e-06	0.00029
GO:0051707	P	response to other organism	6.2e-06	0.00029
GO:0009409	P	response to cold	6.7e-06	0.00029
GO:0007568	P	aging	7.6e-06	0.00031
GO:0000165	P	MAPKKK cascade	8.9e-06	0.00033
GO:0023046	P	signaling process	9.1e-06	0.00033
GO:0023060	P	signal transmission	9.1e-06	0.00033
GO:0009733	P	response to auxin stimulus	9.8e-06	0.00034
GO:0009738	P	abscisic acid mediated signaling pathway	1e-05	0.00034
GO:0007243	P	protein kinase cascade	1.4e-05	0.00045
GO:0071215	P	cellular response to abscisic acid stimulus	1.4e-05	0.00045
GO:0009814	P	defense response, incompatible interaction	1.5e-05	0.00045
GO:0009607	P	response to biotic stimulus	1.6e-05	0.00046
GO:0007242	P	intracellular signaling cascade	1.6e-05	0.00046
GO:0009627	P	systemic acquired resistance	2.2e-05	0.00062
GO:0048585	P	negative regulation of response to stimulus	2.5e-05	0.00069
GO:0071310	P	cellular response to organic substance	5.9e-05	0.0016
GO:0009697	P	salicylic acid biosynthetic process	6.3e-05	0.0017
GO:0009696	P	salicylic acid metabolic process	7.7e-05	0.0019
GO:0070887	P	cellular response to chemical stimulus	7.6e-05	0.0019
GO:0023052	P	signaling	8.5e-05	0.002
GO:0009266	P	response to temperature stimulus	9e-05	0.0021
GO:0051704	P	multi-organism process	9.6e-05	0.0022
GO:0032870	P	cellular response to hormone stimulus	0.00021	0.0047
GO:0050794	P	regulation of cellular process	0.00024	0.0054
GO:0045087	P	innate immune response	0.00031	0.0066
GO:0009867	P	jasmonic acid mediated signaling pathway	0.00036	0.0074
GO:0071395	P	cellular response to jasmonic acid stimulus	0.00036	0.0074
GO:0010310	P	regulation of hydrogen peroxide metabolic process	0.00038	0.0075
GO:0080010	P	regulation of oxygen and reactive oxygen species metabolic process	0.00038	0.0075
GO:0048583	P	regulation of response to stimulus	0.0004	0.0078
GO:0050789	P	regulation of biological process	0.00042	0.0079
GO:0002376	P	immune system process	0.00045	0.008
GO:0019438	P	aromatic compound biosynthetic process	0.00045	0.008
GO:0006869	P	lipid transport	0.00045	0.008
GO:0006955	P	immune response	0.00045	0.008
GO:0009755	P	hormone-mediated signaling pathway	0.00057	0.01
GO:0050832	P	defense response to fungus	0.00059	0.01
GO:0009617	P	response to bacterium	0.00075	0.013
GO:0009620	P	response to fungus	0.00082	0.014
GO:0009723	P	response to ethylene stimulus	0.00095	0.015
GO:0009751	P	response to salicylic acid stimulus	0.00094	0.015
GO:0051716	P	cellular response to stimulus	0.0014	0.022
GO:0009862	P	systemic acquired resistance, salicylic acid mediated signaling pathway	0.0015	0.024
GO:0042742	P	defense response to bacterium	0.0017	0.026
GO:0031348	P	negative regulation of defense response	0.002	0.03
GO:0010876	P	lipid localization	0.0023	0.035
GO:0002682	P	regulation of immune system process	0.003	0.042
GO:0050776	P	regulation of immune response	0.003	0.042
GO:0045088	P	regulation of innate immune response	0.0029	0.042
P, Biological process

## Sheet: Table S8
Table S8 GO function term overrepresented in genes showing B1&B2 > M1&M2 expression and upregulation in both C24/Col and C24/Ler hybrids
GO accession	Term type	Term	p value	FDR
GO:0010200	P	response to chitin	7.8e-35	9.3e-32
GO:0009743	P	response to carbohydrate stimulus	1.4e-25	8.2e-23
GO:0002679	P	respiratory burst during defense response	3.9e-23	1.2e-20
GO:0045730	P	respiratory burst	3.9e-23	1.2e-20
GO:0002252	P	immune effector process	2.1e-18	5e-16
GO:0009612	P	response to mechanical stimulus	9.7e-18	2e-15
GO:0009611	P	response to wounding	3.1e-17	5.3e-15
GO:0010033	P	response to organic substance	1.2e-16	1.9e-14
GO:0002376	P	immune system process	3.9e-16	4.7e-14
GO:0006955	P	immune response	3.9e-16	4.7e-14
GO:0045087	P	innate immune response	1.1e-15	1.2e-13
GO:0006952	P	defense response	3.1e-15	3.2e-13
GO:0009620	P	response to fungus	2.7e-14	2.5e-12
GO:0042221	P	response to chemical stimulus	2.6e-13	2.3e-11
GO:0050832	P	defense response to fungus	3.2e-13	2.5e-11
GO:0006950	P	response to stress	3.5e-13	2.6e-11
GO:0000160	P	two-component signal transduction system (phosphorelay)	1.1e-12	7.6e-11
GO:0071310	P	cellular response to organic substance	1.3e-12	8.9e-11
GO:0009873	P	ethylene mediated signaling pathway	2.6e-12	1.7e-10
GO:0023034	P	intracellular signaling pathway	3.5e-12	2.1e-10
GO:0070887	P	cellular response to chemical stimulus	3.9e-12	2.2e-10
GO:0009719	P	response to endogenous stimulus	8.2e-12	4.5e-10
GO:0071369	P	cellular response to ethylene stimulus	1.5e-11	8.1e-10
GO:0009723	P	response to ethylene stimulus	1.7e-11	8.4e-10
GO:0071495	P	cellular response to endogenous stimulus	1.8e-11	8.9e-10
GO:0023033	P	signaling pathway	2.5e-11	1.2e-09
GO:0007242	P	intracellular signaling cascade	5.1e-11	2.3e-09
GO:0051707	P	response to other organism	1.2e-10	5e-09
GO:0009607	P	response to biotic stimulus	1.2e-10	5e-09
GO:0009605	P	response to external stimulus	1.4e-10	5.7e-09
GO:0009628	P	response to abiotic stimulus	2.1e-10	8.1e-09
GO:0009753	P	response to jasmonic acid stimulus	1.2e-09	4.4e-08
GO:0050896	P	response to stimulus	2.8e-09	1e-07
GO:0009755	P	hormone-mediated signaling pathway	6.3e-09	2.2e-07
GO:0051704	P	multi-organism process	6.6e-09	2.3e-07
GO:0009751	P	response to salicylic acid stimulus	7.7e-09	2.6e-07
GO:0007165	P	signal transduction	8.6e-09	2.7e-07
GO:0051716	P	cellular response to stimulus	8.7e-09	2.7e-07
GO:0010363	P	regulation of plant-type hypersensitive response	8.4e-09	2.7e-07
GO:0006612	P	protein targeting to membrane	1e-08	3.1e-07
GO:0080135	P	regulation of cellular response to stress	1.1e-08	3.4e-07
GO:0009626	P	plant-type hypersensitive response	1.5e-08	4.4e-07
GO:0032870	P	cellular response to hormone stimulus	1.6e-08	4.5e-07
GO:0034050	P	host programmed cell death induced by symbiont	1.6e-08	4.5e-07
GO:0043067	P	regulation of programmed cell death	1.9e-08	5.2e-07
GO:0023046	P	signaling process	2.5e-08	6.4e-07
GO:0010941	P	regulation of cell death	2.5e-08	6.4e-07
GO:0023060	P	signal transmission	2.5e-08	6.4e-07
GO:0031347	P	regulation of defense response	2.9e-08	6.9e-07
GO:0009725	P	response to hormone stimulus	2.9e-08	6.9e-07
GO:0045088	P	regulation of innate immune response	2.9e-08	6.9e-07
GO:0002682	P	regulation of immune system process	3.1e-08	7e-07
GO:0050776	P	regulation of immune response	3.1e-08	7e-07
GO:0071446	P	cellular response to salicylic acid stimulus	3.8e-08	8.3e-07
GO:0009863	P	salicylic acid mediated signaling pathway	3.8e-08	8.3e-07
GO:0080134	P	regulation of response to stress	3.9e-08	8.5e-07
GO:0012501	P	programmed cell death	5.6e-08	1.2e-06
GO:0023052	P	signaling	1.1e-07	2.3e-06
GO:0016265	P	death	1.7e-07	3.4e-06
GO:0008219	P	cell death	1.7e-07	3.4e-06
GO:0048583	P	regulation of response to stimulus	3.2e-07	6.4e-06
GO:0009862	P	systemic acquired resistance, salicylic acid mediated signaling pathway	4.4e-07	8.6e-06
GO:0030968	P	endoplasmic reticulum unfolded protein response	5.1e-07	9.8e-06
GO:0006986	P	response to unfolded protein	5.5e-07	1e-05
GO:0034620	P	cellular response to unfolded protein	5.5e-07	1e-05
GO:0071445	P	cellular response to protein stimulus	6.4e-07	1.2e-05
GO:0006984	P	ER-nuclear signaling pathway	6.8e-07	1.2e-05
GO:0031348	P	negative regulation of defense response	7.2e-07	1.3e-05
GO:0071216	P	cellular response to biotic stimulus	7.3e-07	1.3e-05
GO:0009414	P	response to water deprivation	1e-06	1.8e-05
GO:0009415	P	response to water	1.2e-06	1.9e-05
GO:0009625	P	response to insect	1.2e-06	1.9e-05
GO:0033554	P	cellular response to stress	1.3e-06	2.1e-05
GO:0048585	P	negative regulation of response to stimulus	4.8e-06	7.8e-05
GO:0043069	P	negative regulation of programmed cell death	7.9e-06	0.00013
GO:0009692	P	ethylene metabolic process	9e-06	0.00014
GO:0009693	P	ethylene biosynthetic process	9e-06	0.00014
GO:0060548	P	negative regulation of cell death	9e-06	0.00014
GO:0043449	P	cellular alkene metabolic process	9.8e-06	0.00015
GO:0043450	P	alkene biosynthetic process	9.8e-06	0.00015
GO:0009867	P	jasmonic acid mediated signaling pathway	1.1e-05	0.00016
GO:0071395	P	cellular response to jasmonic acid stimulus	1.1e-05	0.00016
GO:0031323	P	regulation of cellular metabolic process	1.8e-05	0.00025
GO:0000165	P	MAPKKK cascade	2.5e-05	0.00035
GO:0006605	P	protein targeting	2.7e-05	0.00038
GO:0009738	P	abscisic acid mediated signaling pathway	2.7e-05	0.00038
GO:0009627	P	systemic acquired resistance	2.7e-05	0.00038
GO:0009889	P	regulation of biosynthetic process	3.1e-05	0.00042
GO:0031326	P	regulation of cellular biosynthetic process	3.1e-05	0.00042
GO:0034976	P	response to endoplasmic reticulum stress	3.2e-05	0.00043
GO:0050794	P	regulation of cellular process	3.3e-05	0.00043
GO:0007243	P	protein kinase cascade	3.6e-05	0.00047
GO:0070727	P	cellular macromolecule localization	3.7e-05	0.00048
GO:0071215	P	cellular response to abscisic acid stimulus	3.8e-05	0.00048
GO:0009695	P	jasmonic acid biosynthetic process	3.9e-05	0.00049
GO:0019222	P	regulation of metabolic process	4.1e-05	0.00051
GO:0044283	P	small molecule biosynthetic process	4.7e-05	0.00057
GO:0031408	P	oxylipin biosynthetic process	4.7e-05	0.00057
GO:0080090	P	regulation of primary metabolic process	5.3e-05	0.00064
GO:0051789	P	response to protein stimulus	5.3e-05	0.00064
GO:0042398	P	cellular amino acid derivative biosynthetic process	5.5e-05	0.00066
GO:0033036	P	macromolecule localization	6e-05	0.00071
GO:0006575	P	cellular amino acid derivative metabolic process	6.6e-05	0.00077
GO:0009694	P	jasmonic acid metabolic process	7.8e-05	0.0009
GO:0006355	P	regulation of transcription, DNA-dependent	7.9e-05	0.0009
GO:0045449	P	regulation of transcription	8e-05	0.00091
GO:0051252	P	regulation of RNA metabolic process	8.3e-05	0.00093
GO:0009814	P	defense response, incompatible interaction	9.1e-05	0.001
GO:0031407	P	oxylipin metabolic process	9.6e-05	0.0011
GO:0009737	P	response to abscisic acid stimulus	9.8e-05	0.0011
GO:0006886	P	intracellular protein transport	0.0001	0.0011
GO:0009642	P	response to light intensity	0.00011	0.0011
GO:0034613	P	cellular protein localization	0.00012	0.0012
GO:0010310	P	regulation of hydrogen peroxide metabolic process	0.00013	0.0013
GO:0080010	P	regulation of oxygen and reactive oxygen species metabolic process	0.00013	0.0013
GO:0010556	P	regulation of macromolecule biosynthetic process	0.00013	0.0014
GO:0019219	P	regulation of nucleobase, nucleoside, nucleotide and nucleic acid metabolic process	0.00013	0.0014
GO:0051171	P	regulation of nitrogen compound metabolic process	0.00015	0.0015
GO:0009617	P	response to bacterium	0.00017	0.0017
GO:0006351	P	transcription, DNA-dependent	0.00017	0.0017
GO:0006350	P	transcription	0.00017	0.0017
GO:0032774	P	RNA biosynthetic process	0.00017	0.0017
GO:0009409	P	response to cold	0.00019	0.0019
GO:0006555	P	methionine metabolic process	0.00019	0.0019
GO:0050789	P	regulation of biological process	0.0002	0.002
GO:0009266	P	response to temperature stimulus	0.00022	0.0021
GO:0010468	P	regulation of gene expression	0.00024	0.0022
GO:0045184	P	establishment of protein localization	0.00025	0.0023
GO:0015031	P	protein transport	0.00025	0.0023
GO:0048519	P	negative regulation of biological process	0.00028	0.0026
GO:0051641	P	cellular localization	0.00031	0.0028
GO:0046907	P	intracellular transport	0.00033	0.003
GO:0008104	P	protein localization	0.00033	0.003
GO:0006979	P	response to oxidative stress	0.00036	0.0032
GO:0060255	P	regulation of macromolecule metabolic process	0.00039	0.0035
GO:0043436	P	oxoacid metabolic process	0.0004	0.0036
GO:0019752	P	carboxylic acid metabolic process	0.0004	0.0036
GO:0006082	P	organic acid metabolic process	0.00041	0.0036
GO:0009066	P	aspartate family amino acid metabolic process	0.00044	0.0038
GO:0042180	P	cellular ketone metabolic process	0.00045	0.0038
GO:0009651	P	response to salt stress	0.00068	0.0058
GO:0051649	P	establishment of localization in cell	0.0007	0.006
GO:0061025	P	membrane fusion	0.00089	0.0074
GO:0006944	P	cellular membrane fusion	0.00089	0.0074
GO:0006970	P	response to osmotic stress	0.00099	0.0083
GO:0048523	P	negative regulation of cellular process	0.001	0.0086
GO:0065007	P	biological regulation	0.0011	0.0087
GO:0006633	P	fatty acid biosynthetic process	0.0015	0.012
GO:0042743	P	hydrogen peroxide metabolic process	0.0016	0.013
GO:0006790	P	sulfur metabolic process	0.0016	0.013
GO:0006800	P	oxygen and reactive oxygen species metabolic process	0.0019	0.015
GO:0009058	P	biosynthetic process	0.0027	0.022
GO:0009416	P	response to light stimulus	0.003	0.023
GO:0042742	P	defense response to bacterium	0.0032	0.025
GO:0031325	P	positive regulation of cellular metabolic process	0.0039	0.03
GO:0051179	P	localization	0.004	0.031
GO:0009893	P	positive regulation of metabolic process	0.0041	0.031
GO:0009314	P	response to radiation	0.0045	0.034
GO:0006725	P	cellular aromatic compound metabolic process	0.0045	0.034
GO:0000096	P	sulfur amino acid metabolic process	0.005	0.038
GO:0044249	P	cellular biosynthetic process	0.0051	0.038
GO:0032787	P	monocarboxylic acid metabolic process	0.0051	0.038
GO:0016070	P	RNA metabolic process	0.0054	0.04
GO:0006519	P	cellular amino acid and derivative metabolic process	0.0055	0.04
P, Biological process

## Sheet: Table S9
Table S9 Sequences of primers used in this study
Name	Primer sequences (5'-3')
RT-PCR/qPCR
At1g02205	CCACCATCAC TTTCTTTATT CCCGC	GAACTGCGTG TGGTGCAGCG AGTGG
At1g07430	TCGTCACCTT CTCAAAGCTC TCCTG	GAGAAAACTC CGTTTGTTTC CGTAC
At1g16370	CAGATGCTTA TCCCACGTGG CACTG	TCTTGCGACC CAAGGAATCG TCTGG
At1g17380	TGAATCACAG CCAGGAAGTT CGCAG	TGTTAGGTGA TTATTATCAG TAGGC
At1g33760	CCGCTTCAAC GTTAACCAGT TGTCC	CCGAACTAGA GCTTTCCGGC CGAGG
At1g52690	CAAGAACAGA GTTACAAAGC TGGTG	CCGACATGTA GCTTCCTGTC TTGTC
At1g66090	CGGCGTAAAT CCATCTGATG TGCGG	TCAGTTTTTC TGAGACATCA GTTGC
At2g20750	ATGCAGCTCT TTCCGGTCAT	GAGGGGACAAGAGATT
At2g26020	AGTTGTGCGAGAAGCCAAGT	TGCAAGATCCATGTTTTGCT
At2g35290	AACTCCGTCGTCTCTCCTCA	GTAGAGGCATCGTTCCGAAG
At2g42540	GTATGGCTTC TTCTTTCCAC AGCGG	CAACGTAGTC TTTCGCTTTC TCACC
At3g22830	ATTCAAGAAC CAATCATGTC GTGTC	TTCTTGAGGA GATGCTTTTG CCCTC
At3g23250	AACTGGCGAG CCCTCCCTAA GCAAG	AGTCTCTTCT TCAAGTGAGT GTGCC
At3g47420	ATGAATCTTA GGATCTTCTT GACTG	ACATAGCAGC AGCGATCAAC GAGCC
At4g05100	GTCTCAAGAA AGGACCATGG ACTCC	ACCACTTGTT TCCCATGATG CTGTG
At4g17490	TCTAGAATGGCTACACCAAACGAAGT	GAGCTCTCAAACAACGGTCAATTGTG
At4g30280	GTCTCCGGGA ACTACGTGGG ATGAG	AACTCCAATT GACTCGGAGT TCTTG
At4g30290	AGATACATTG GGGTGATGGT CGTGG	ATATGGATGA CCACTTATGT TCCCC
At4g33550	GGAAGTGGCA TGATAAGGAC ATTGG	TTGAAACGTA GCGGCAAGCA CAAGG
At4g38840	GCGATCAGAA TCCCTCGTGT GCTGC	GGATTGTGAG GCCACCCATT GGATG
At5g27420	TCTAGAATGGATCCCATAAAACACAT	GAGCTCCTAAACCGGTAGCCTAAGGG
At5g42380	ATCAAGAACG AGCAGTAATA GTAGC	ACCATCTTCC CCTTCCATAA GCTTC
At5g43780	CGGGGTTGAT CGAGCCAGAC GGAGG	GGATTGTGAG GCCACCCATT GGATG
At5g43840	TTTCTCCAGC TTTGTTAGAC AGCTC	TTCGTCGCAG TCTAACCAGT TCTAC
At5g45340	AACTTTACTC ACAAGACCCT AATGT	TTTGGAATGA TAATCTCCTT GATGG
At5g47230	AAATCAAAAT CAGTTTGAAC CGGAG	ATCGCTGTAT CAAACGTCCC AAGCC
At5g51190	AACAGCAAGA ACAAGACCAG TCAGC	TCTCAGCCGC ATACTTACCC CATGG
At5g52300	TAACGGGTAA ACCTAAGTCT CTTAG	GCCTCTCTTT TCGCTTCCCA GTCCG
At5g59320	CACATGCCTT GTTTTAACGG TGTGC	GAGGCTAGAC TTGGGTTGAG ACCAG
At5g59730	CCTCTTCTCC ACCAACAGTC GTCGT	GACACTAGTC GTAGTCGAAG TACTG
At5g62520	GAAATACGGT TGGTGCTCTG TTTCG	GTAGAAACTA AATCATCCAC ACCAG
At5g66640	CAAGGCAAAA GAATACAAGT GGACG	CGATTACGGT AGTACTCCTT GTAGC
IPP2	TACCGAATTTTCGTGCTTTCTCTGG	ATGGCTGCAACAAGTGTTAGTCAC
For genotyping
NPTII	TCGAAGCTTATGATTGAACAAGATGGA	GAGAAGCTTTCAGAAGAACTCGTCAAG
For Construction
At1g05575	TCTAGAATGGAAGGAAGCTTTGAAGG	GAGCTCTCAAATGATTTCCGATGGTG
At1g19210	TCTAGAATGGAAGGGTCGTCTTCTTC	GAGCTCTCAAAAATTCCAAAGAAACATGG
At1g22810	TCTAGAATGGATTACAGAGAATCCAC	GAGCTCTCAAACGTGATCGTGGCCGCCCA
At1g33760	TCTAGAATGGAAAACACTTACGTTGG	GAGCTCTCAATTATTAGAATTCCATATGGAC
At2g20750	TCTAGAATGCAGCTCTTTCCGGTCAT	GAGCTCTTAGAGAACAGGGGAGAAGT
At2g26020	TCTAGAATGGCTAAGTTTGCTTCCAT	GAGCTCTTAACATGGGACGTAACAGA
At2g35290	TCTAGAATGGGTTGTCTGATTTCTCC	GAGCTCCTAACAATCTTGAGCATAGA
At2g44840	TCTAGAATGAGTTCATCTGATTCCGT	GAGCTCTTATATCCGATTATCAGAATAAG
At3g02040	TCTAGAATGTCTCTAAAAGCCATTC	GGATCCTTAGTGTTGTATCAACTCG
At3g23250	TCTAGAATGGGAAGAGCACCATGCT	GGATCCCTAGAGCCCGGCTAAGAGA
At4g17490	TCTAGAATGGCTACACCAAACGAAGT	GAGCTCTCAAACAACGGTCAATTGTG
At4g28250	TCTAGAATGCAGCTTTTTCCAGTCAT	GAGCTCTCAAAGGACAGGGGAGAAGT
At4g30290	TCTAGAATGAAGTCTTTTACGTTCTTG	GAGCTCTTAGCTGCACTCTGGAGGAA
At4g34410	TCTAGAATGCATTATCCTAACAACAGACCCG	GGATCCTCACTGGAACATATCAGCAATAGT
At4g38840	TCTAGAATGGCGATCAGAATCCCTCG	GAGCTCTCAGTTGAAGCGAGAAGCAA
At5g07100	TCTAGAATGGGCTCTTTTGATCGCCA	GAGCTCTTATGTCTCTGTTTTTCCAAG
At5g09570	TCTAGAATGCCTCGAGGAAGCTCCGGA	GAGCTCTTAAGCAGCCACCACGGAAC
At5g27420	TCTAGAATGGATCCCATAAAACACAT	GAGCTCCTAAACCGGTAGCCTAAGGG
At5g42380	TCTAGAATGACTCTCGCTAAGAACCA	GAGCTCTCAACGCATCATCAAAACAA
At5g47230	TCTAGAATGGCGACTCCTAACGAAGT	GAGCTCTCAAACAACGGTCAACTGGGA
At5g51190	TCTAGAATGGCTTCTTCACATCAACA	GAGCTCTTAAGTAACTACGAGTTGAG
